# Supplementary material for: Facing the Green Threat: A Water Flea’s Defenses against a Carnivorous Plant
Source: MDPI journal article supplement (doi:10.3390/ijms23126474), 2022-06-09
Supplement: s1 [file s1]

**Table S1: Number of total animals measured in the 10 replicates of the 6-day experiment as well as the ANOVA F-values of the respective statistics (Fig 1). All shown ANOVAs had 3 degrees of freedom (DF).**

| Day                      | 1           | 2          | 3           | 4          | 5           | 6          |
|--------------------------|-------------|------------|-------------|------------|-------------|------------|
|                          | ANOVA       | ANOVA      | ANOVA       | ANOVA      | ANOVA       | ANOVA      |
|                          | n           | n          | n           | n          | n           | n          |
| Treatment                | F-value     | F-value    | F-value     | F-value    | F-value     | F-value    |
|                          | Body length | Body width | Body length | Body width | Body length | Body width |
| tap water control        | 84          | 69         | 45          | 63         | 73          | 55         |
| <i>Ceratophyllum</i>     | 37          | 30         | 35          | 25         | 44          | 29         |
| fed <i>Utricularia</i>   | 79          | 72         | 42          | 50         | 50          | 43         |
| unfed <i>Utricularia</i> | 69          | 59         | 38          | 49         | 64          | 43         |

Table S2: Mean body length and body width in mm  $\pm$ SD of *C. dubia* over the 6 days of the experiment.

| Treatment                | Day 1           |                 | Day 2           |                 | Day 3           |                 | Day 4           |                 | Day 5           |                 | Day 6           |                 |
|--------------------------|-----------------|-----------------|-----------------|-----------------|-----------------|-----------------|-----------------|-----------------|-----------------|-----------------|-----------------|-----------------|
|                          | Body length     | Body width      |
| tap water control        | 0.49 $\pm$ 0.03 | 0.30 $\pm$ 0.02 | 0.59 $\pm$ 0.05 | 0.36 $\pm$ 0.04 | 0.66 $\pm$ 0.05 | 0.41 $\pm$ 0.04 | 0.71 $\pm$ 0.07 | 0.49 $\pm$ 0.07 | 0.74 $\pm$ 0.06 | 0.52 $\pm$ 0.05 | 0.77 $\pm$ 0.05 | 0.56 $\pm$ 0.05 |
| <i>Ceratophyllum</i>     | 0.50 $\pm$ 0.03 | 0.30 $\pm$ 0.02 | 0.60 $\pm$ 0.05 | 0.37 $\pm$ 0.04 | 0.64 $\pm$ 0.07 | 0.42 $\pm$ 0.07 | 0.67 $\pm$ 0.06 | 0.45 $\pm$ 0.07 | 0.71 $\pm$ 0.07 | 0.49 $\pm$ 0.07 | 0.76 $\pm$ 0.06 | 0.54 $\pm$ 0.06 |
| fed <i>Utricularia</i>   | 0.48 $\pm$ 0.03 | 0.29 $\pm$ 0.02 | 0.55 $\pm$ 0.07 | 0.33 $\pm$ 0.05 | 0.57 $\pm$ 0.09 | 0.35 $\pm$ 0.08 | 0.62 $\pm$ 0.07 | 0.41 $\pm$ 0.07 | 0.63 $\pm$ 0.08 | 0.42 $\pm$ 0.08 | 0.67 $\pm$ 0.06 | 0.46 $\pm$ 0.06 |
| unfed <i>Utricularia</i> | 0.50 $\pm$ 0.05 | 0.30 $\pm$ 0.03 | 0.57 $\pm$ 0.07 | 0.36 $\pm$ 0.05 | 0.60 $\pm$ 0.06 | 0.38 $\pm$ 0.04 | 0.65 $\pm$ 0.06 | 0.44 $\pm$ 0.06 | 0.67 $\pm$ 0.05 | 0.45 $\pm$ 0.05 | 0.71 $\pm$ 0.05 | 0.49 $\pm$ 0.05 |

**Table S3: Bonferroni corrected pairwise t-test results for 2D morphology body length analysis. Significant results marked in red.**

| Day                       | 1              |                   |                  | 2              |                   |                  | 3              |                   |                  |
|---------------------------|----------------|-------------------|------------------|----------------|-------------------|------------------|----------------|-------------------|------------------|
|                           | Tap water ctrl | fed <i>Utric.</i> | <i>Cer.</i> ctrl | Tap water ctrl | fed <i>Utric.</i> | <i>Cer.</i> ctrl | Tap water ctrl | fed <i>Utric.</i> | <i>Cer.</i> ctrl |
| <i>fed Utricularia</i>    | 0.197          |                   |                  | 0.0022         |                   |                  | 4.9e-8         |                   |                  |
| <i>Ceratophyllum ctrl</i> | 1              | 0.176             |                  | 1              | 0.0013            |                  | 1              | 4.5e-5            |                  |
| unfed <i>Utricularia</i>  | 1              | 0.023             | 1                | 1              | 0.187             | 0.3159           | 0.0042         | 0.0954            | 0.1835           |
| Day                       | 4              |                   |                  | 5              |                   |                  | 6              |                   |                  |
|                           | Tap water ctrl | fed <i>Utric.</i> | <i>Cer.</i> ctrl | Tap water ctrl | fed <i>Utric.</i> | <i>Cer.</i> ctrl | Tap water ctrl | fed <i>Utric.</i> | <i>Cer.</i> ctrl |
| <i>fed Utricularia</i>    | 2.8e-10        |                   |                  | <2e-16         |                   |                  | 2.6e-14        |                   |                  |
| <i>Ceratophyllum ctrl</i> | 0.1649         | 0.0077            |                  | 0.2034         | 6.8e-9            |                  | 1              | 4.2e-9            |                  |
| unfed <i>Utricularia</i>  | 5.3e-5         | 0.1474            | 0.9692           | 2.7e-8         | 0.0025            | 0.0079           | 5e-6           | 0.0066            | 0.0029           |

**Table S4: Bonferroni corrected pairwise t-test results for 2D morphology body width analysis. Significant results marked in red.**

| Day                       | 1              |                   |                  | 2              |                   |                  | 3              |                   |                  |
|---------------------------|----------------|-------------------|------------------|----------------|-------------------|------------------|----------------|-------------------|------------------|
|                           | Tap water ctrl | fed <i>Utric.</i> | <i>Cer.</i> ctrl | Tap water ctrl | fed <i>Utric.</i> | <i>Cer.</i> ctrl | Tap water ctrl | fed <i>Utric.</i> | <i>Cer.</i> ctrl |
| fed <i>Utricularia</i>    | 0.34           |                   |                  | 1              |                   |                  | 1              |                   |                  |
| <i>Ceratophyllum ctrl</i> | 1              | 0.04              |                  | 1              | 1                 |                  | 0.056          | 0.0026            |                  |
| unfed <i>Utricularia</i>  | 1              | 0.16              | 1                | 1              | 0.52              | 1                | 1              | 0.7674            | 0.2504           |
| Day                       | 4              |                   |                  | 5              |                   |                  | 6              |                   |                  |
|                           | Tap water ctrl | fed <i>Utric.</i> | <i>Cer.</i> ctrl | Tap water ctrl | fed <i>Utric.</i> | <i>Cer.</i> ctrl | Tap water ctrl | fed <i>Utric.</i> | <i>Cer.</i> ctrl |
| fed <i>Utricularia</i>    | 0.00024        |                   |                  | 7.9e-8         |                   |                  | 5.2e-8         |                   |                  |
| <i>Ceratophyllum ctrl</i> | 0.06692        | 1                 |                  | 0.1841         | 0.0085            |                  | 1              | 0.001             |                  |
| unfed <i>Utricularia</i>  | 0.62437        | 0.09849           | 1                | 3.3e-6         | 1                 | 0.1059           | 4.8e-7         | 1                 | 0.004            |

Table S5: Mean number off eggs  $\pm$ SD for each treatment on day 3, 4, 5 and 6.

| Treatment                | Day 3        | Day 4        | Day 5          | Day 6          |
|--------------------------|--------------|--------------|----------------|----------------|
| tap water control        | 0 $\pm$ 1.66 | 2 $\pm$ 1.51 | 2 $\pm$ 1.65   | 2 $\pm$ 1.86   |
| <i>Ceratophyllum</i>     | 0 $\pm$ 1.20 | 0 $\pm$ 1.18 | 1 $\pm$ 1.71   | 2.5 $\pm$ 1.73 |
| fed <i>Utricularia</i>   | 0 $\pm$ 1.11 | 1 $\pm$ 1.00 | 0.5 $\pm$ 1.14 | 1 $\pm$ 0.68   |
| unfed <i>Utricularia</i> | 0 $\pm$ 1.71 | 2 $\pm$ 1.45 | 0 $\pm$ 1.20   | 1 $\pm$ 1.13   |
